# Supplementary material
Source: PubMed Central journal article supplement (PMC5962896)
Supplement: jgv-98-1389-s001.pdf [file jgv-98-1389-s001.pdf]

## Supplementary Material

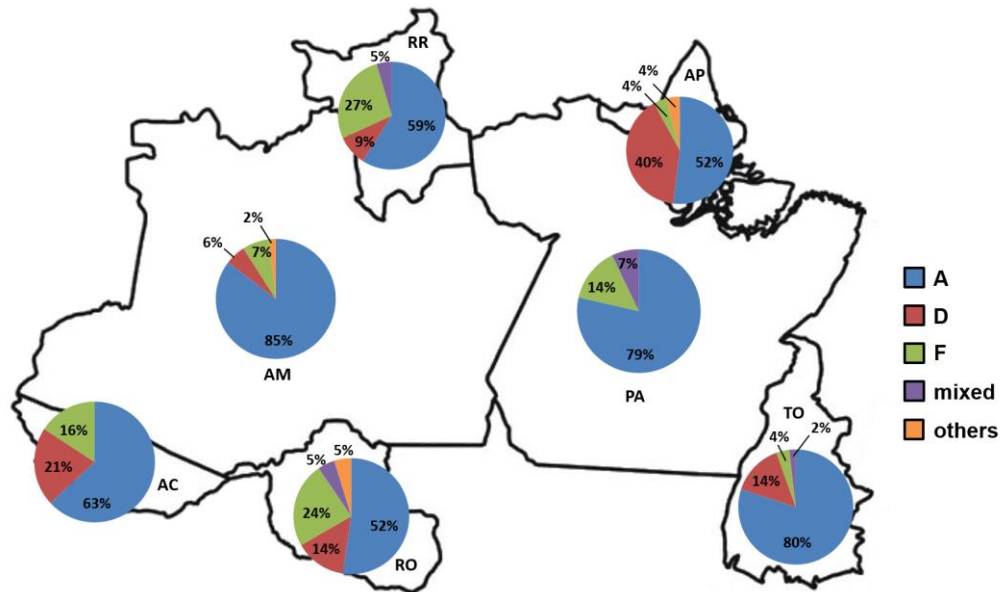

**Fig. S1.** Distribution of HBV genotypes in North region states. State abbreviations: AC (Acre), AM (Amazonas), AP (Amapá), PA (Pará), RO (Rondônia), RR (Roraima), and TO (Tocantins).

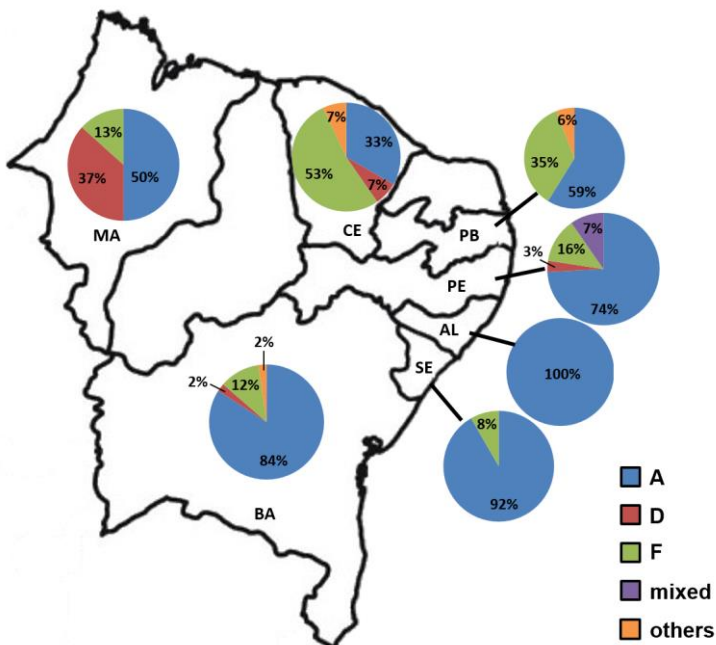

**Fig. S2.** Distribution of HBV genotypes in Northeast region states. State abbreviations: AL (Alagoas), BA (Bahia), CE (Ceará), MA (Maranhão), PB (Paraíba), PE (Pernambuco), and SE (Sergipe).

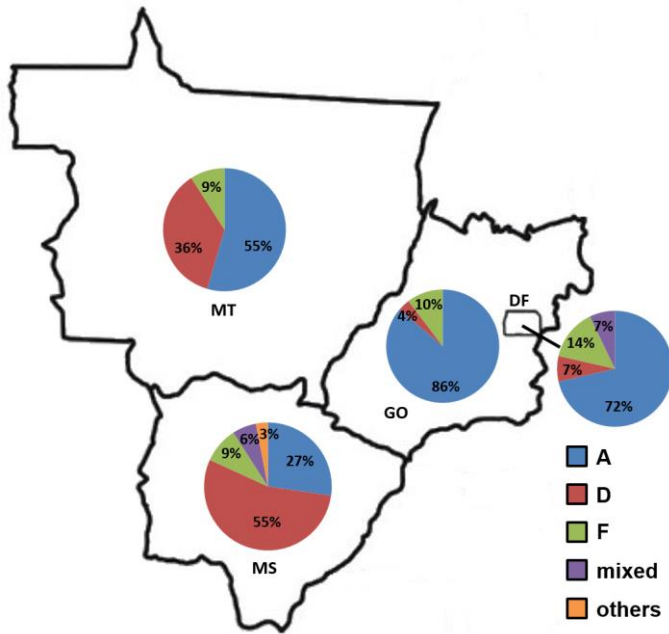

**Fig. S3.** Distribution of HBV genotypes in Central-West region states and the Federal District. State abbreviations: DF (Federal District), GO (Goiás), MT (Mato Grosso), and MS (Mato Grosso do Sul).

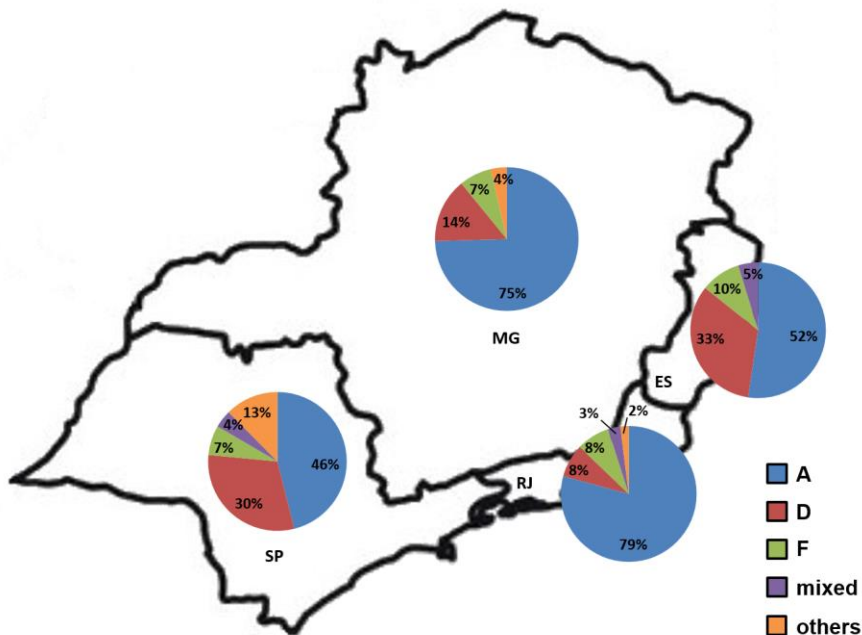

**Fig. S4.** Distribution of HBV genotypes in Southeast region states. State abbreviations: ES (Espírito Santo), MG (Minas Gerais), RJ (Rio de Janeiro), and SP (São Paulo).

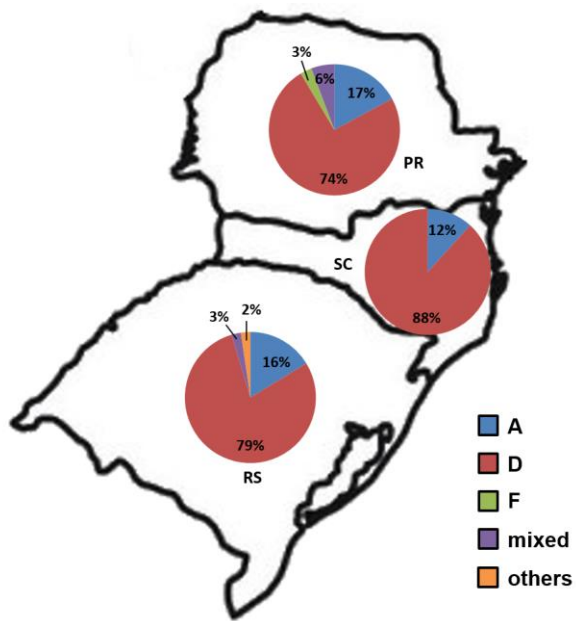

**Fig. S5.** Distribution of HBV genotypes in South region states. State abbreviations: PR (Paraná), SC (Santa Catarina), and RS (Rio Grande do Sul).
